# Supplementary material for: Single-cell gene regulatory network analysis reveals new melanoma cell states and transition trajectories during phenotype switching
Source: bioRxiv or medRxiv preprint supplement (doi:10.1101/715995), 2019-08-08

# Supplementary Figure S1

a

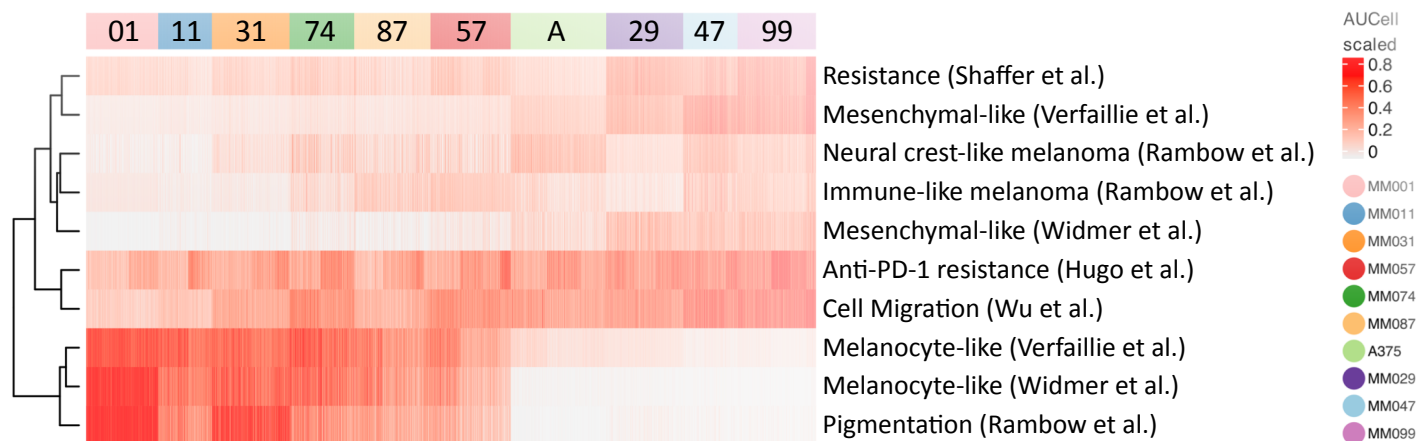

b

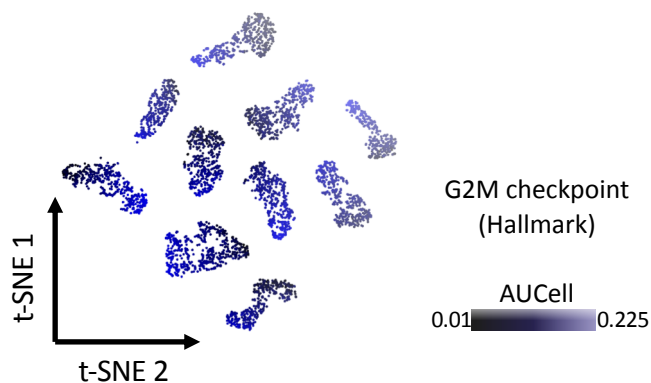

c

## Principal components (PC)

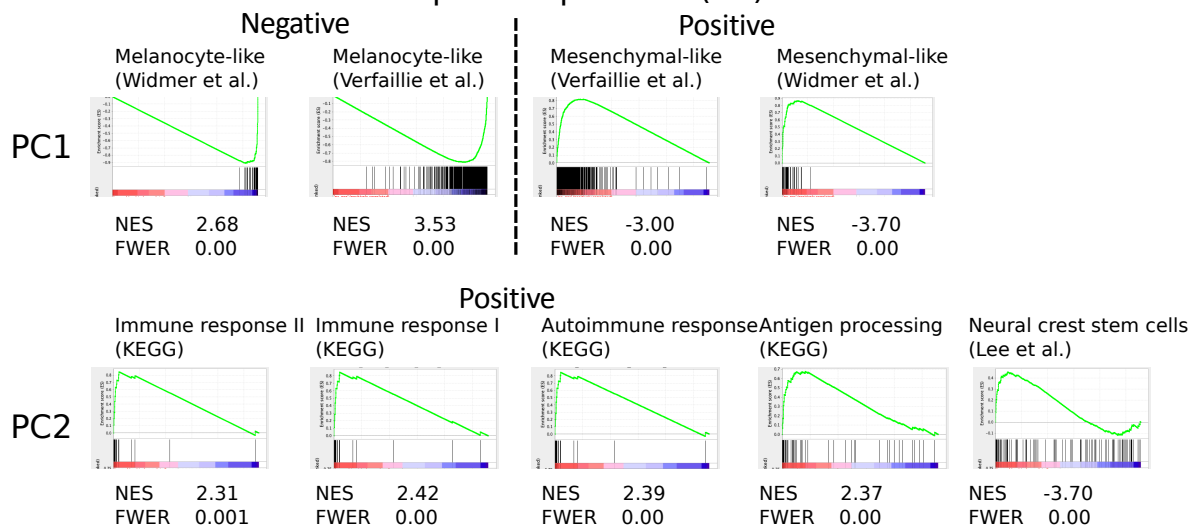

d

## Canonical correlations (CC)

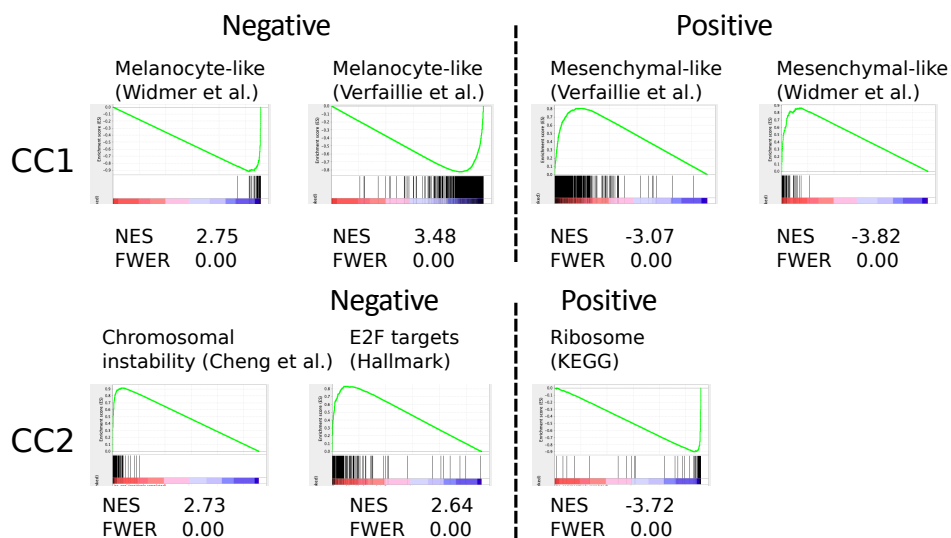

# Supplementary Figure S2

**a**

## Melanocyte-like cultures

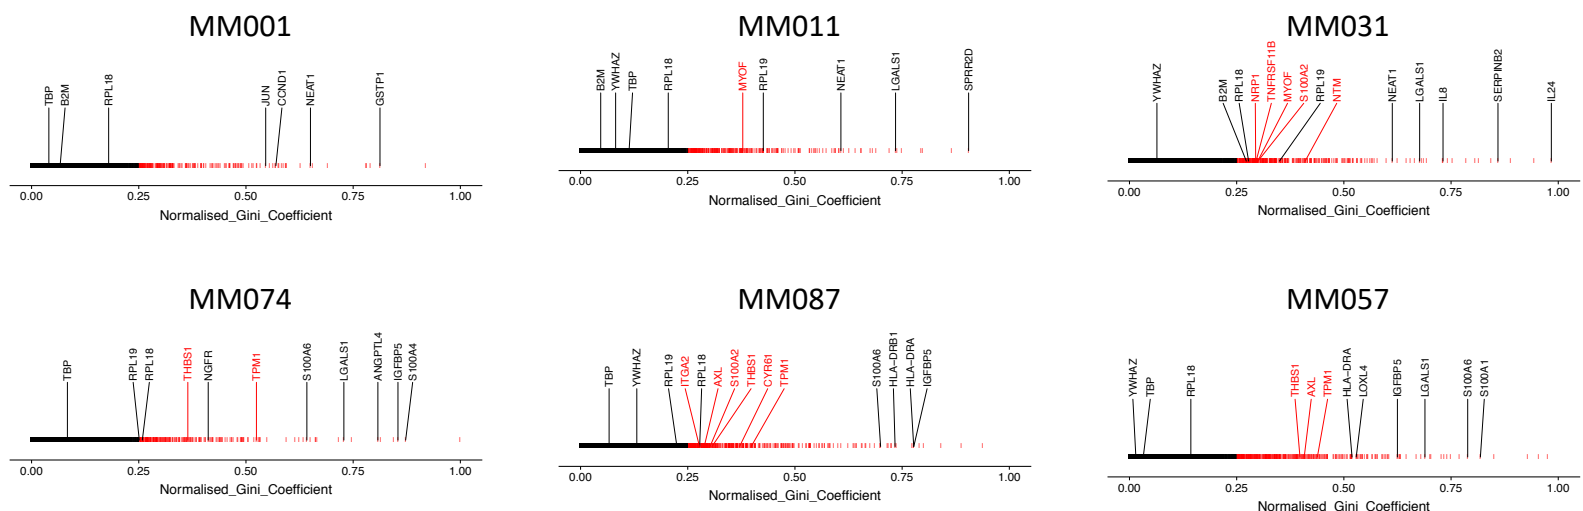

Gene name: present in mesenchymal-like gene signature

## Mesenchymal-like cultures

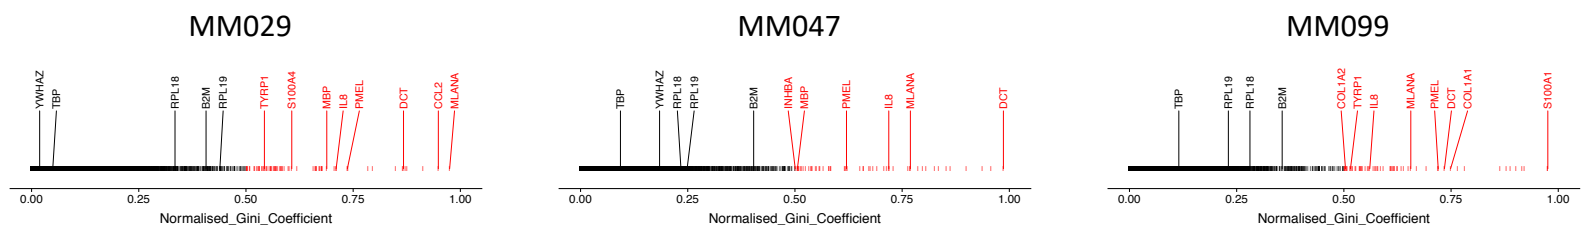

Gene name: present in melanocyte-like gene signature

**b**

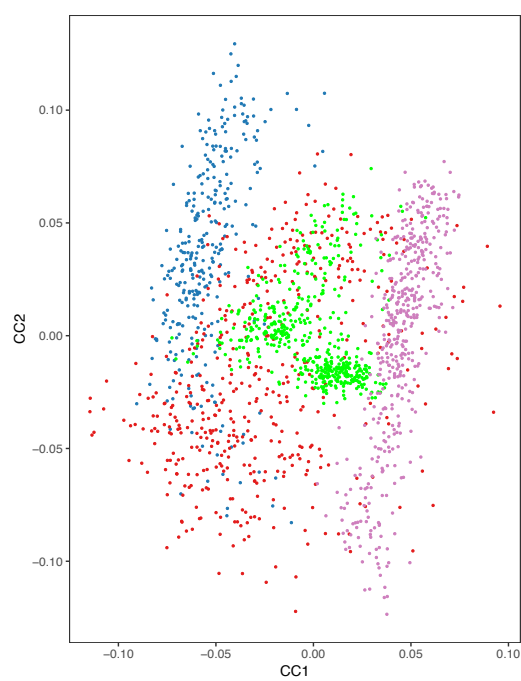

**c**

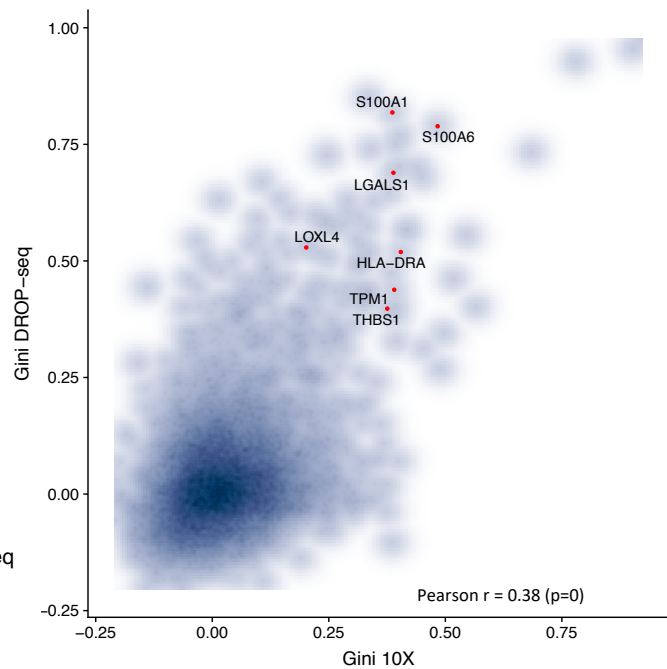

# Supplementary Figure S3

## Cell migration (Wu et al.; including MM074)

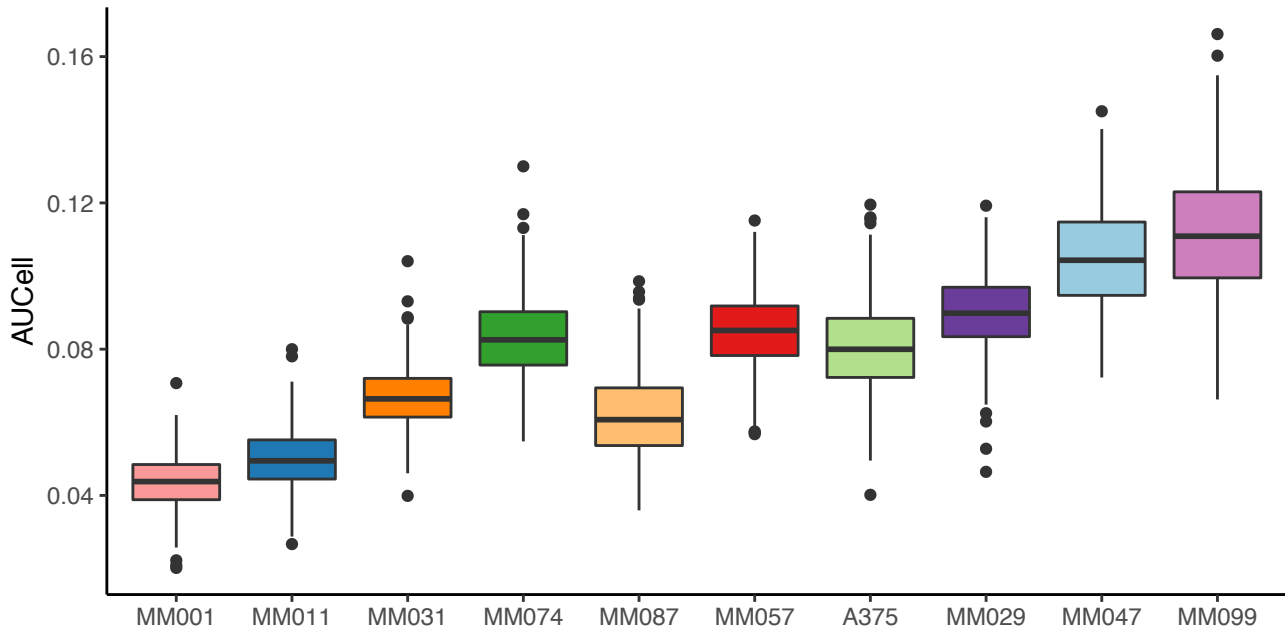

# Supplementary Figure S4

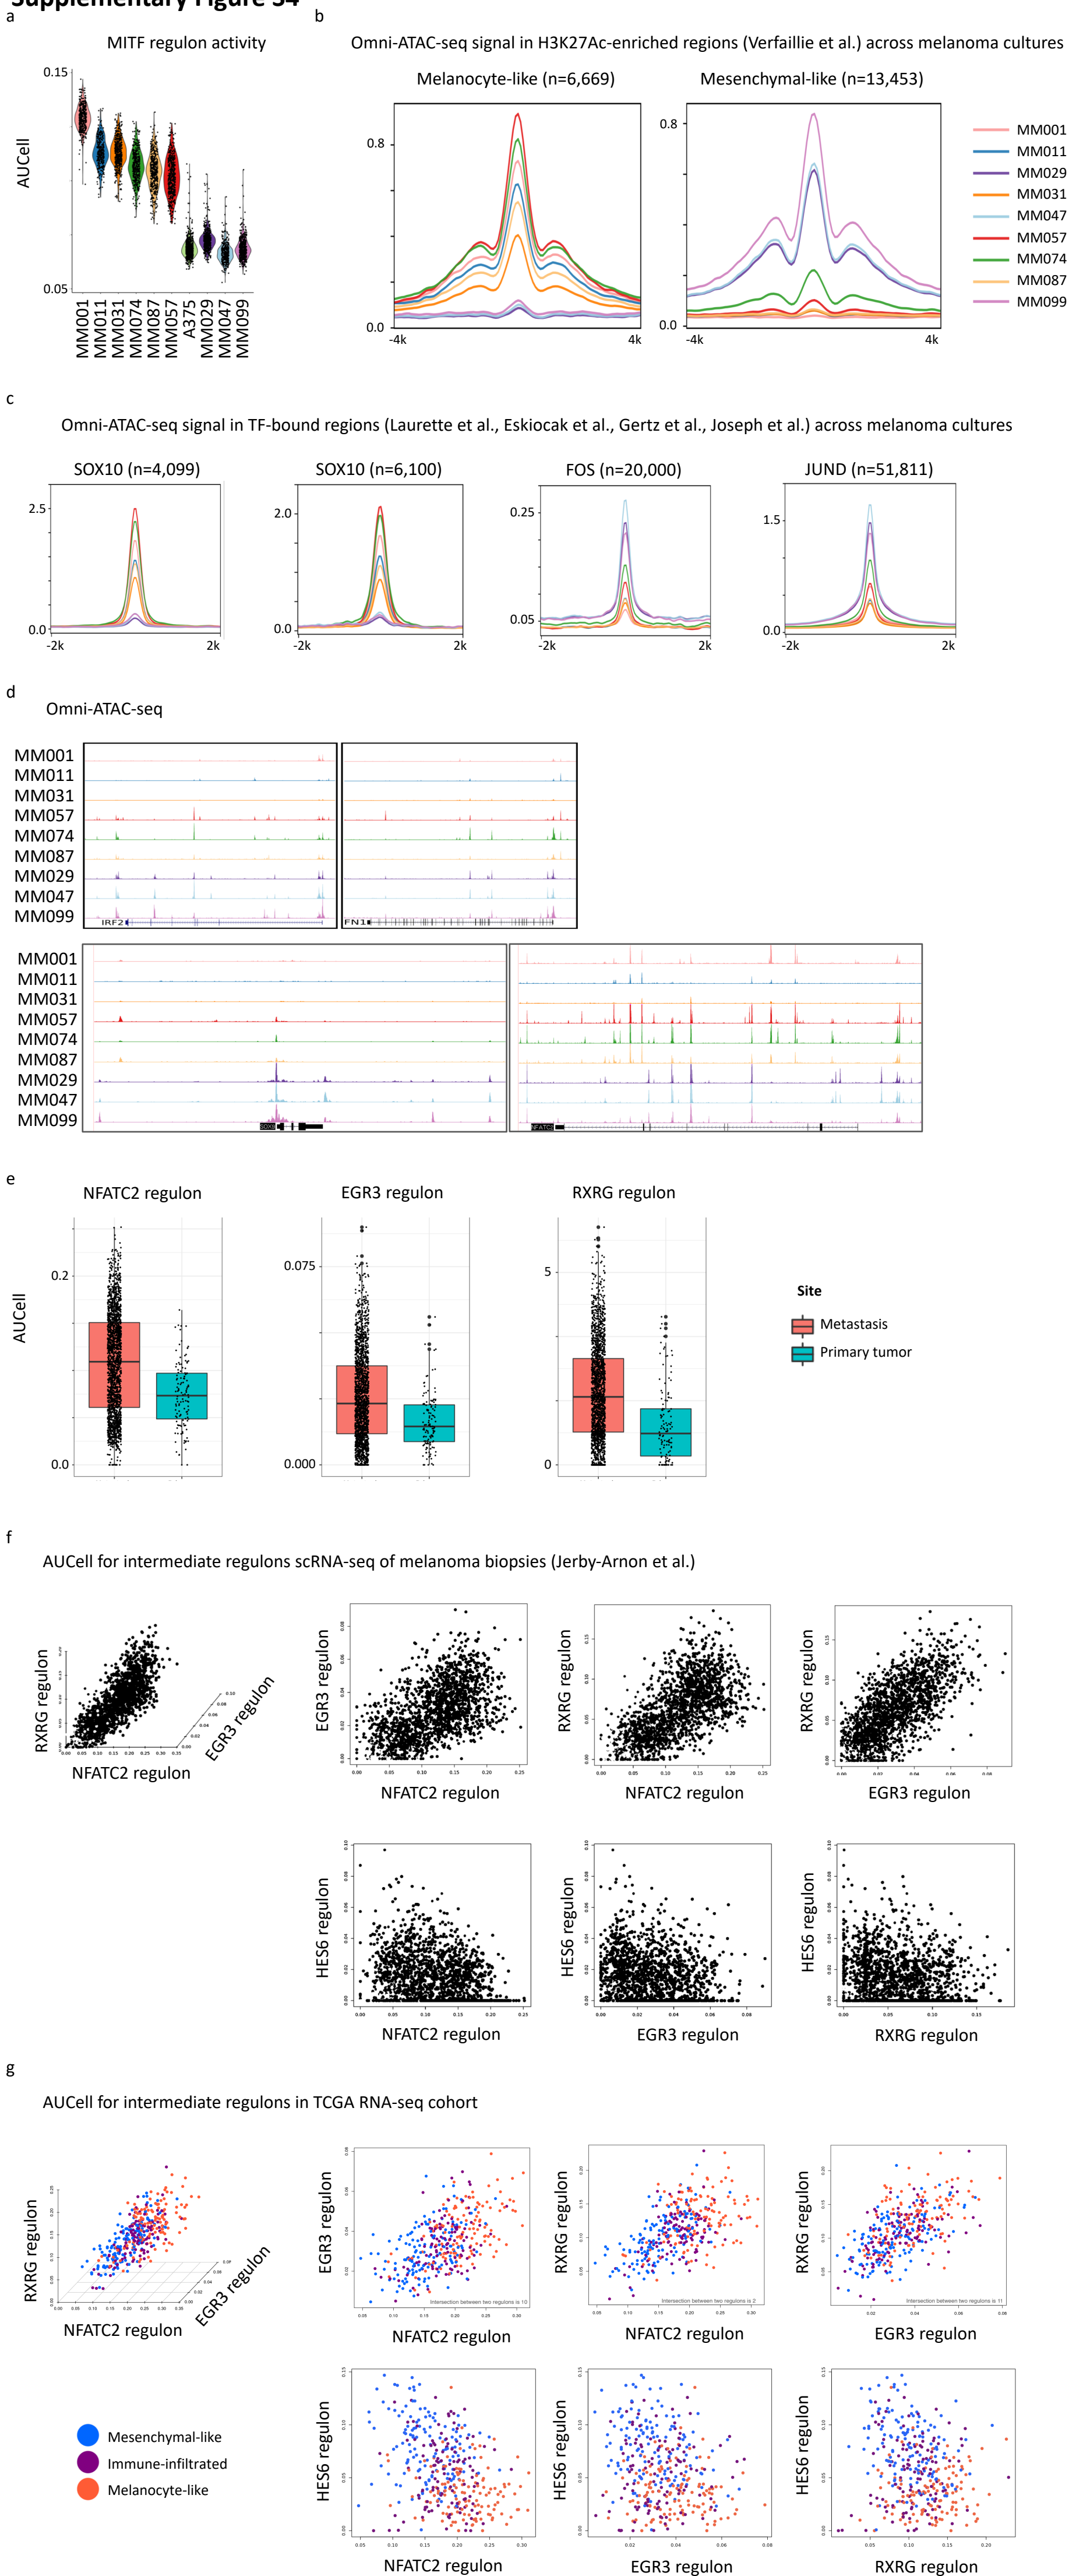

# Supplementary Figure S5

Normalized ATAC-seq signal in TCGA cohort (Corces et al. 2018)

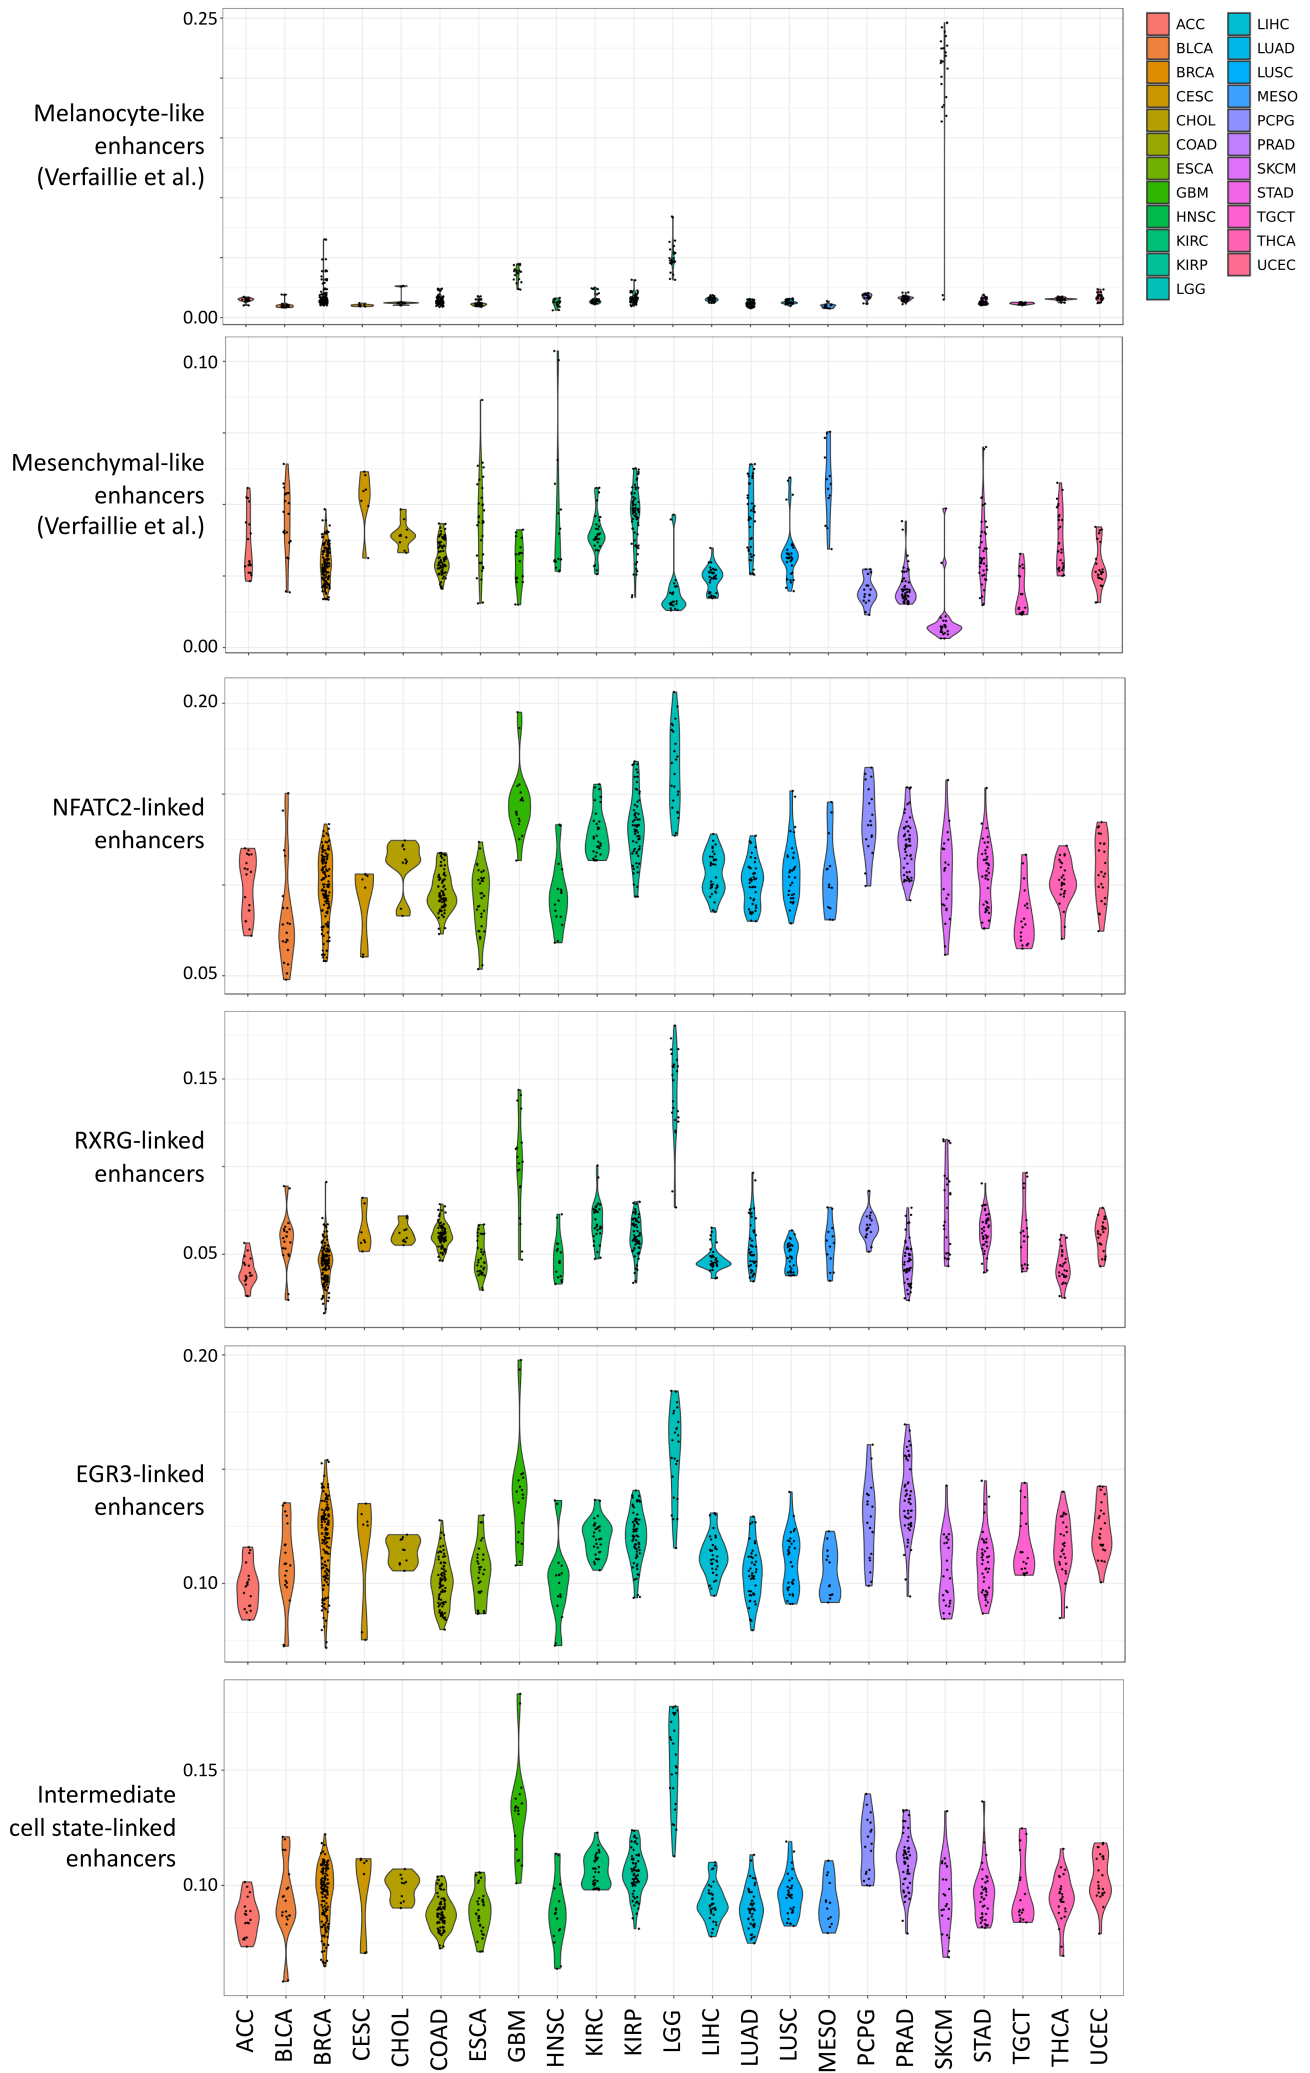

# Supplementary Figure S6

## Alignment of trajectory methods

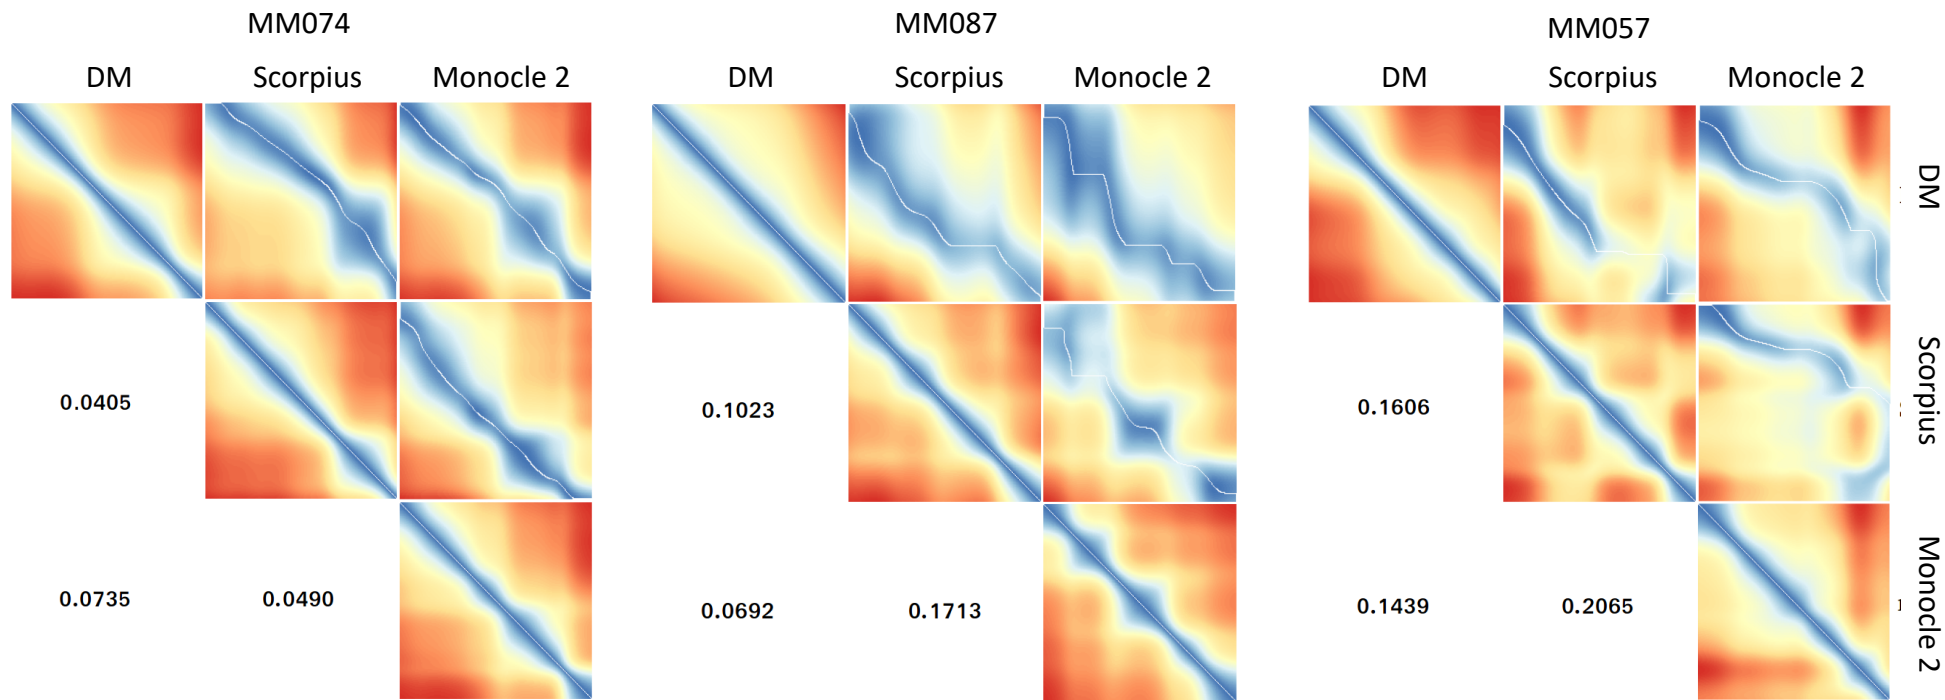

# Supplementary Figure S7

**a** Gene expression changes along pseudotime

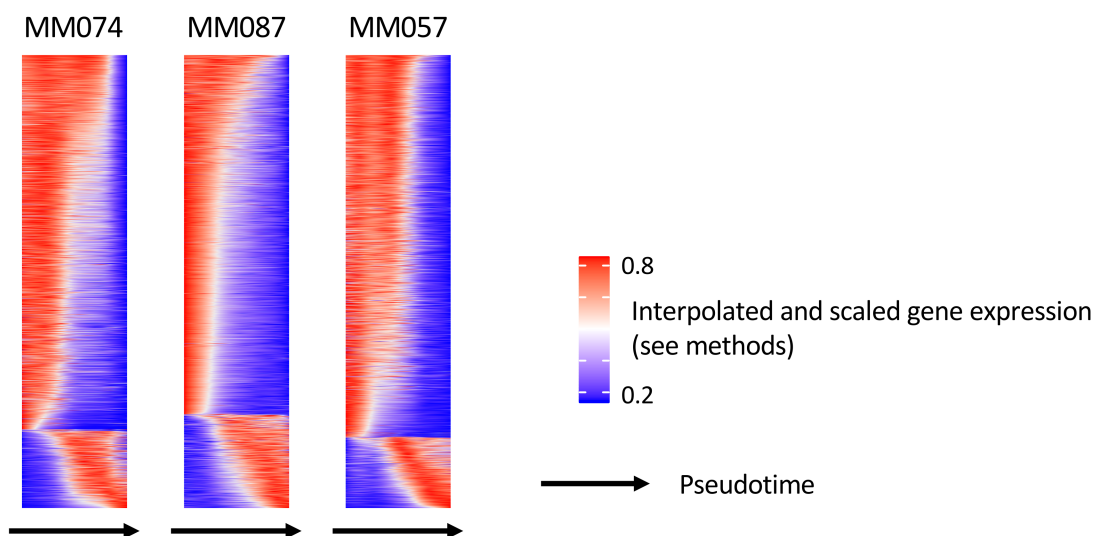

**b** Comparison of gene expression changes across melanoma cultures

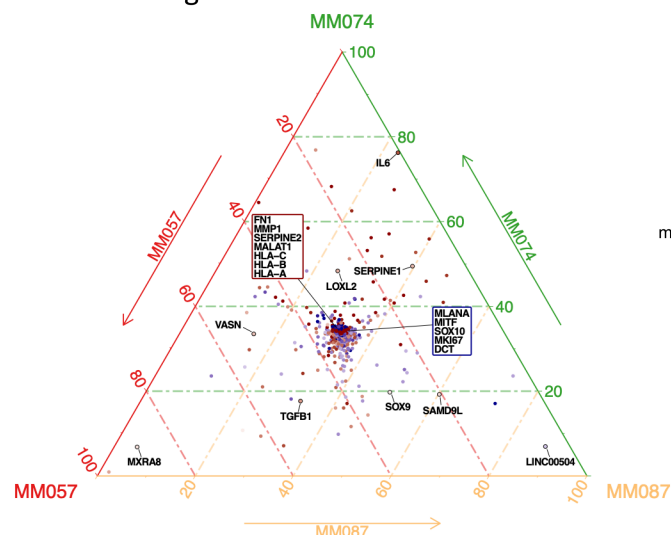

**c** Comparison of gene signature activity changes across melanoma cultures

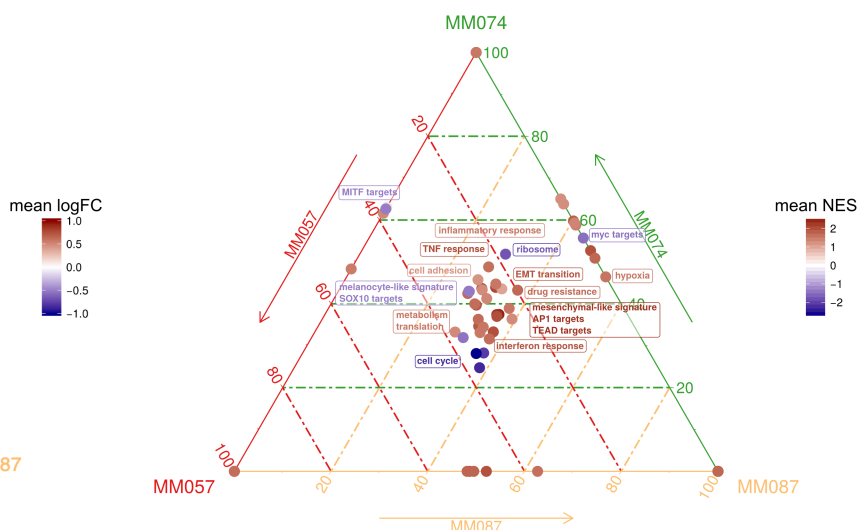

**d** Gene signature activities (see also S7c)

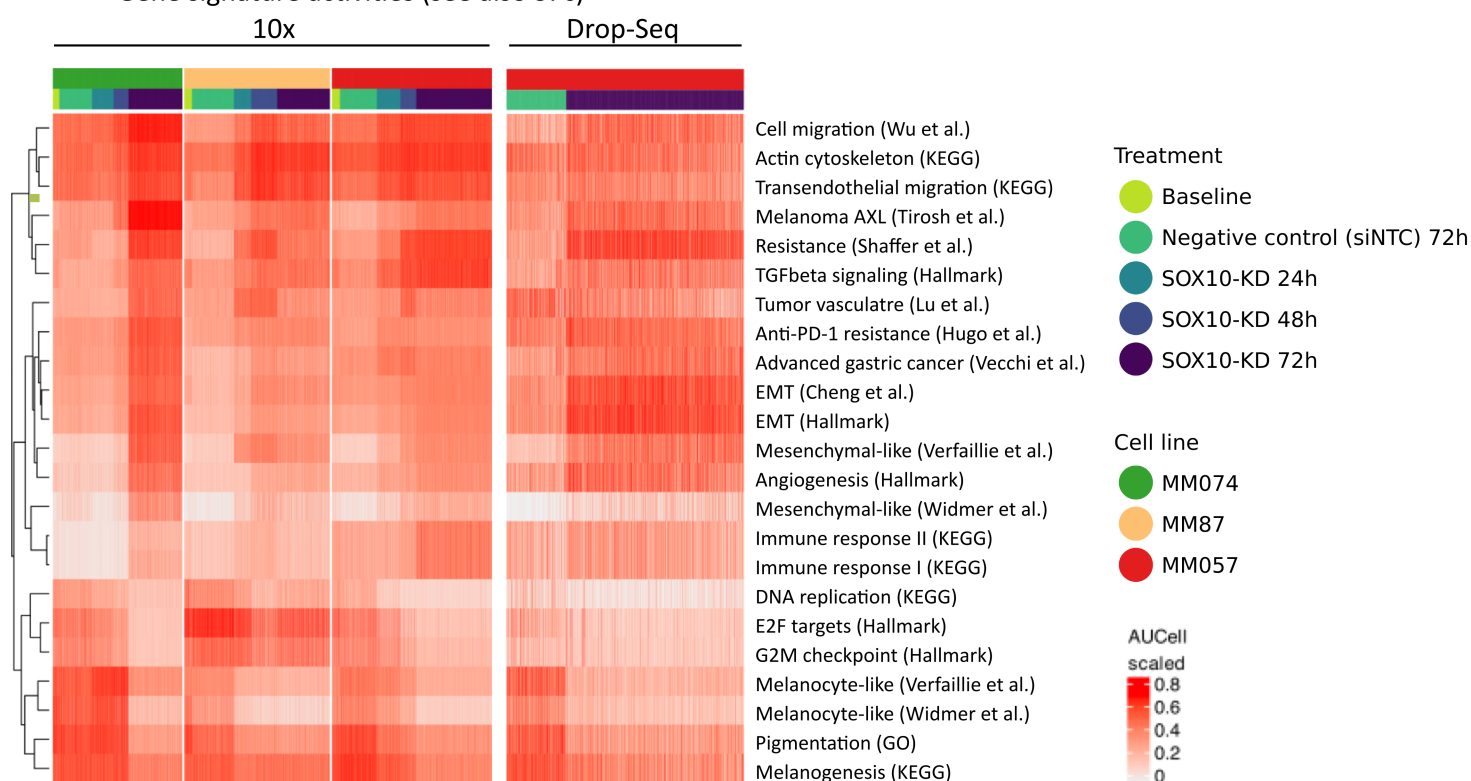

# Supplementary Figure S8

## MM074

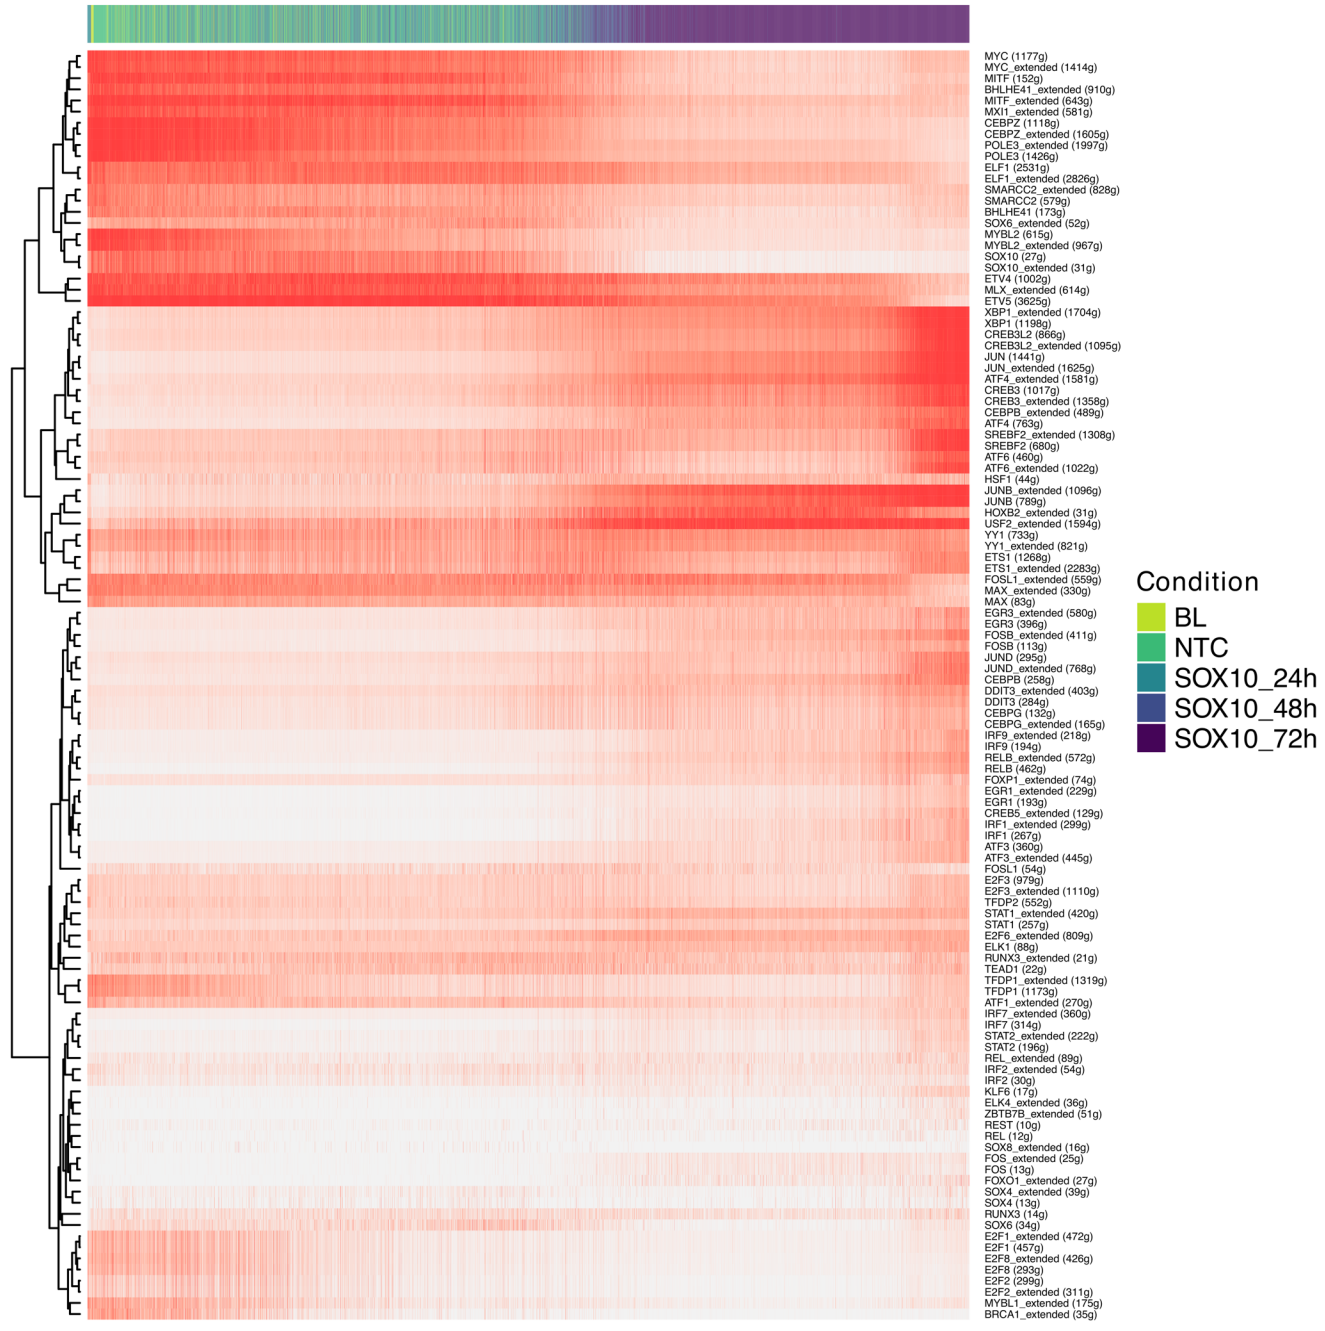



# Supplementary Figure S9

## MM087

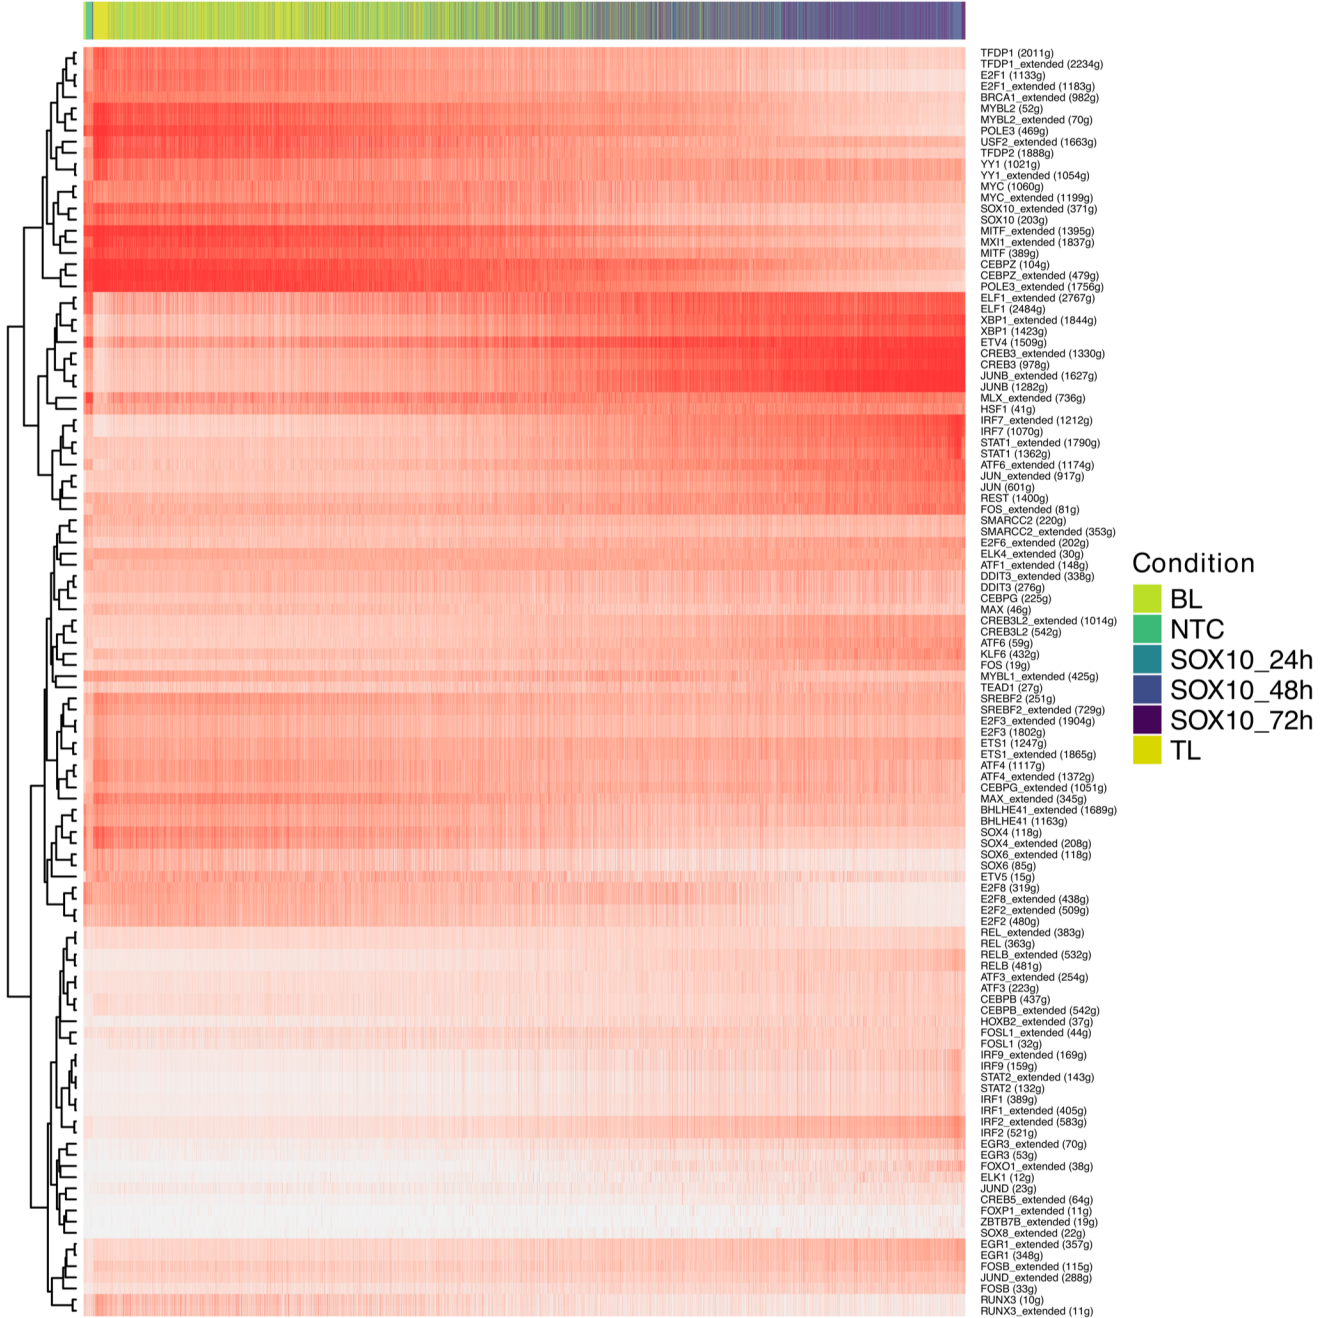

# Supplementary Figure S10

MM057

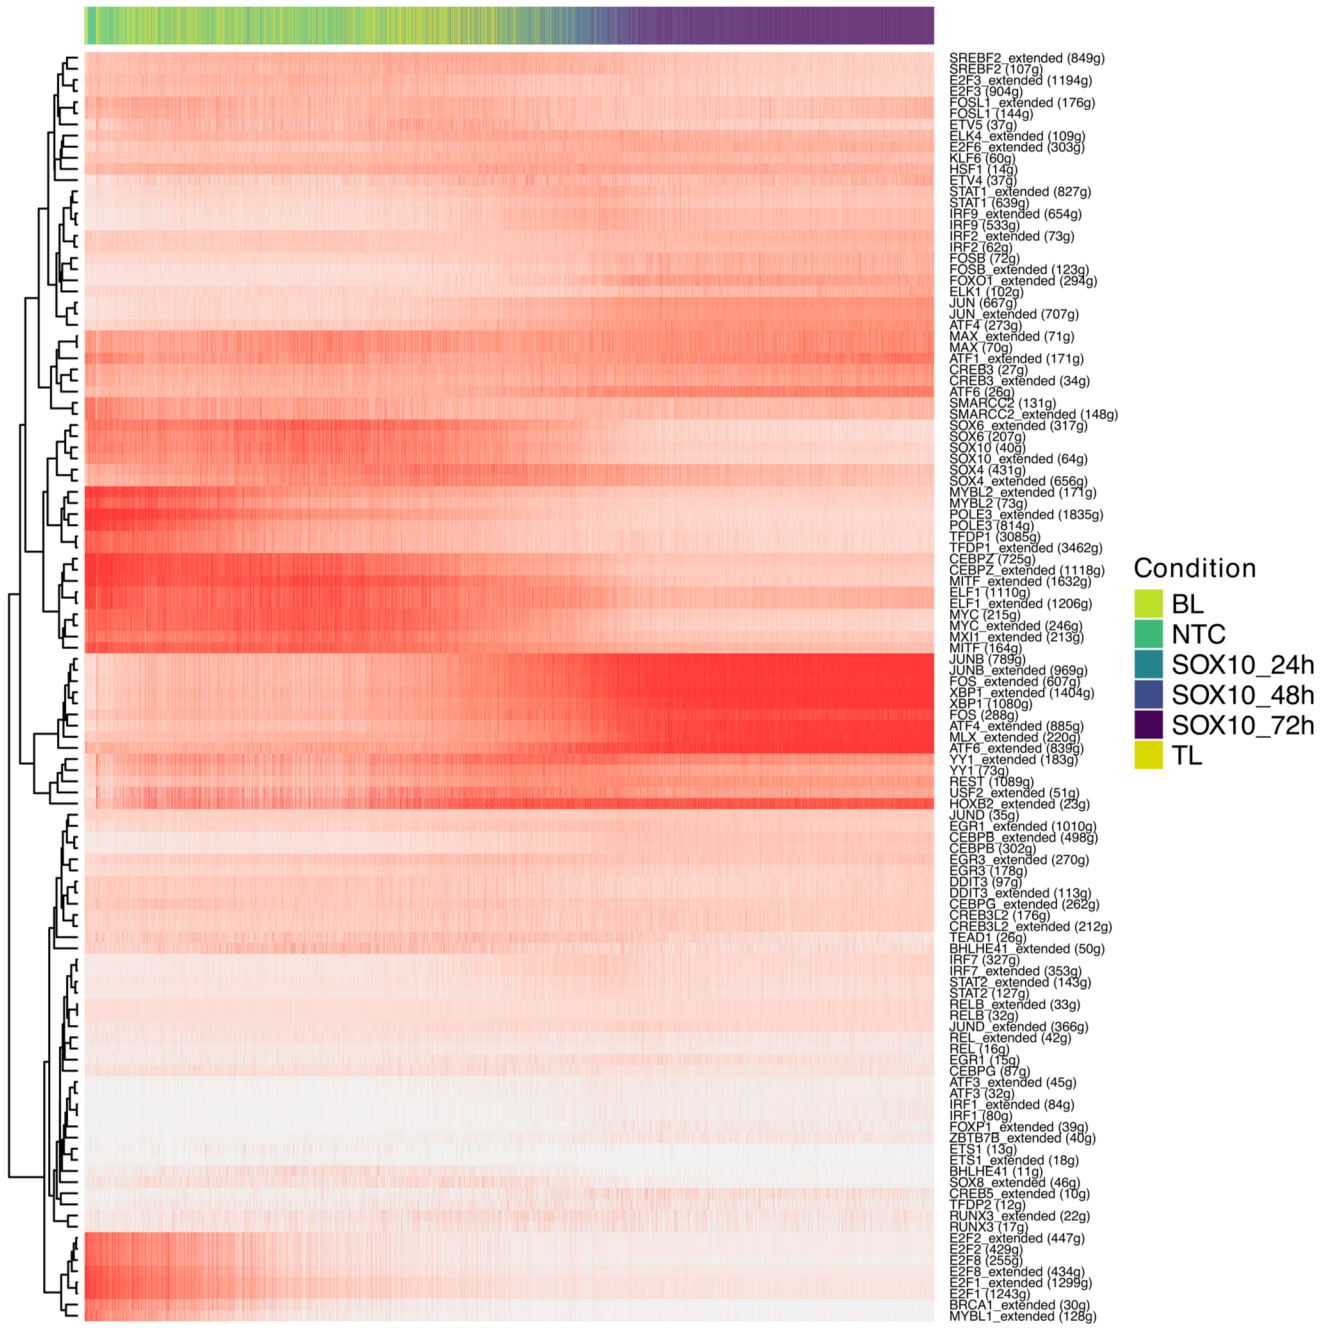

**Supplementary Figure S11**

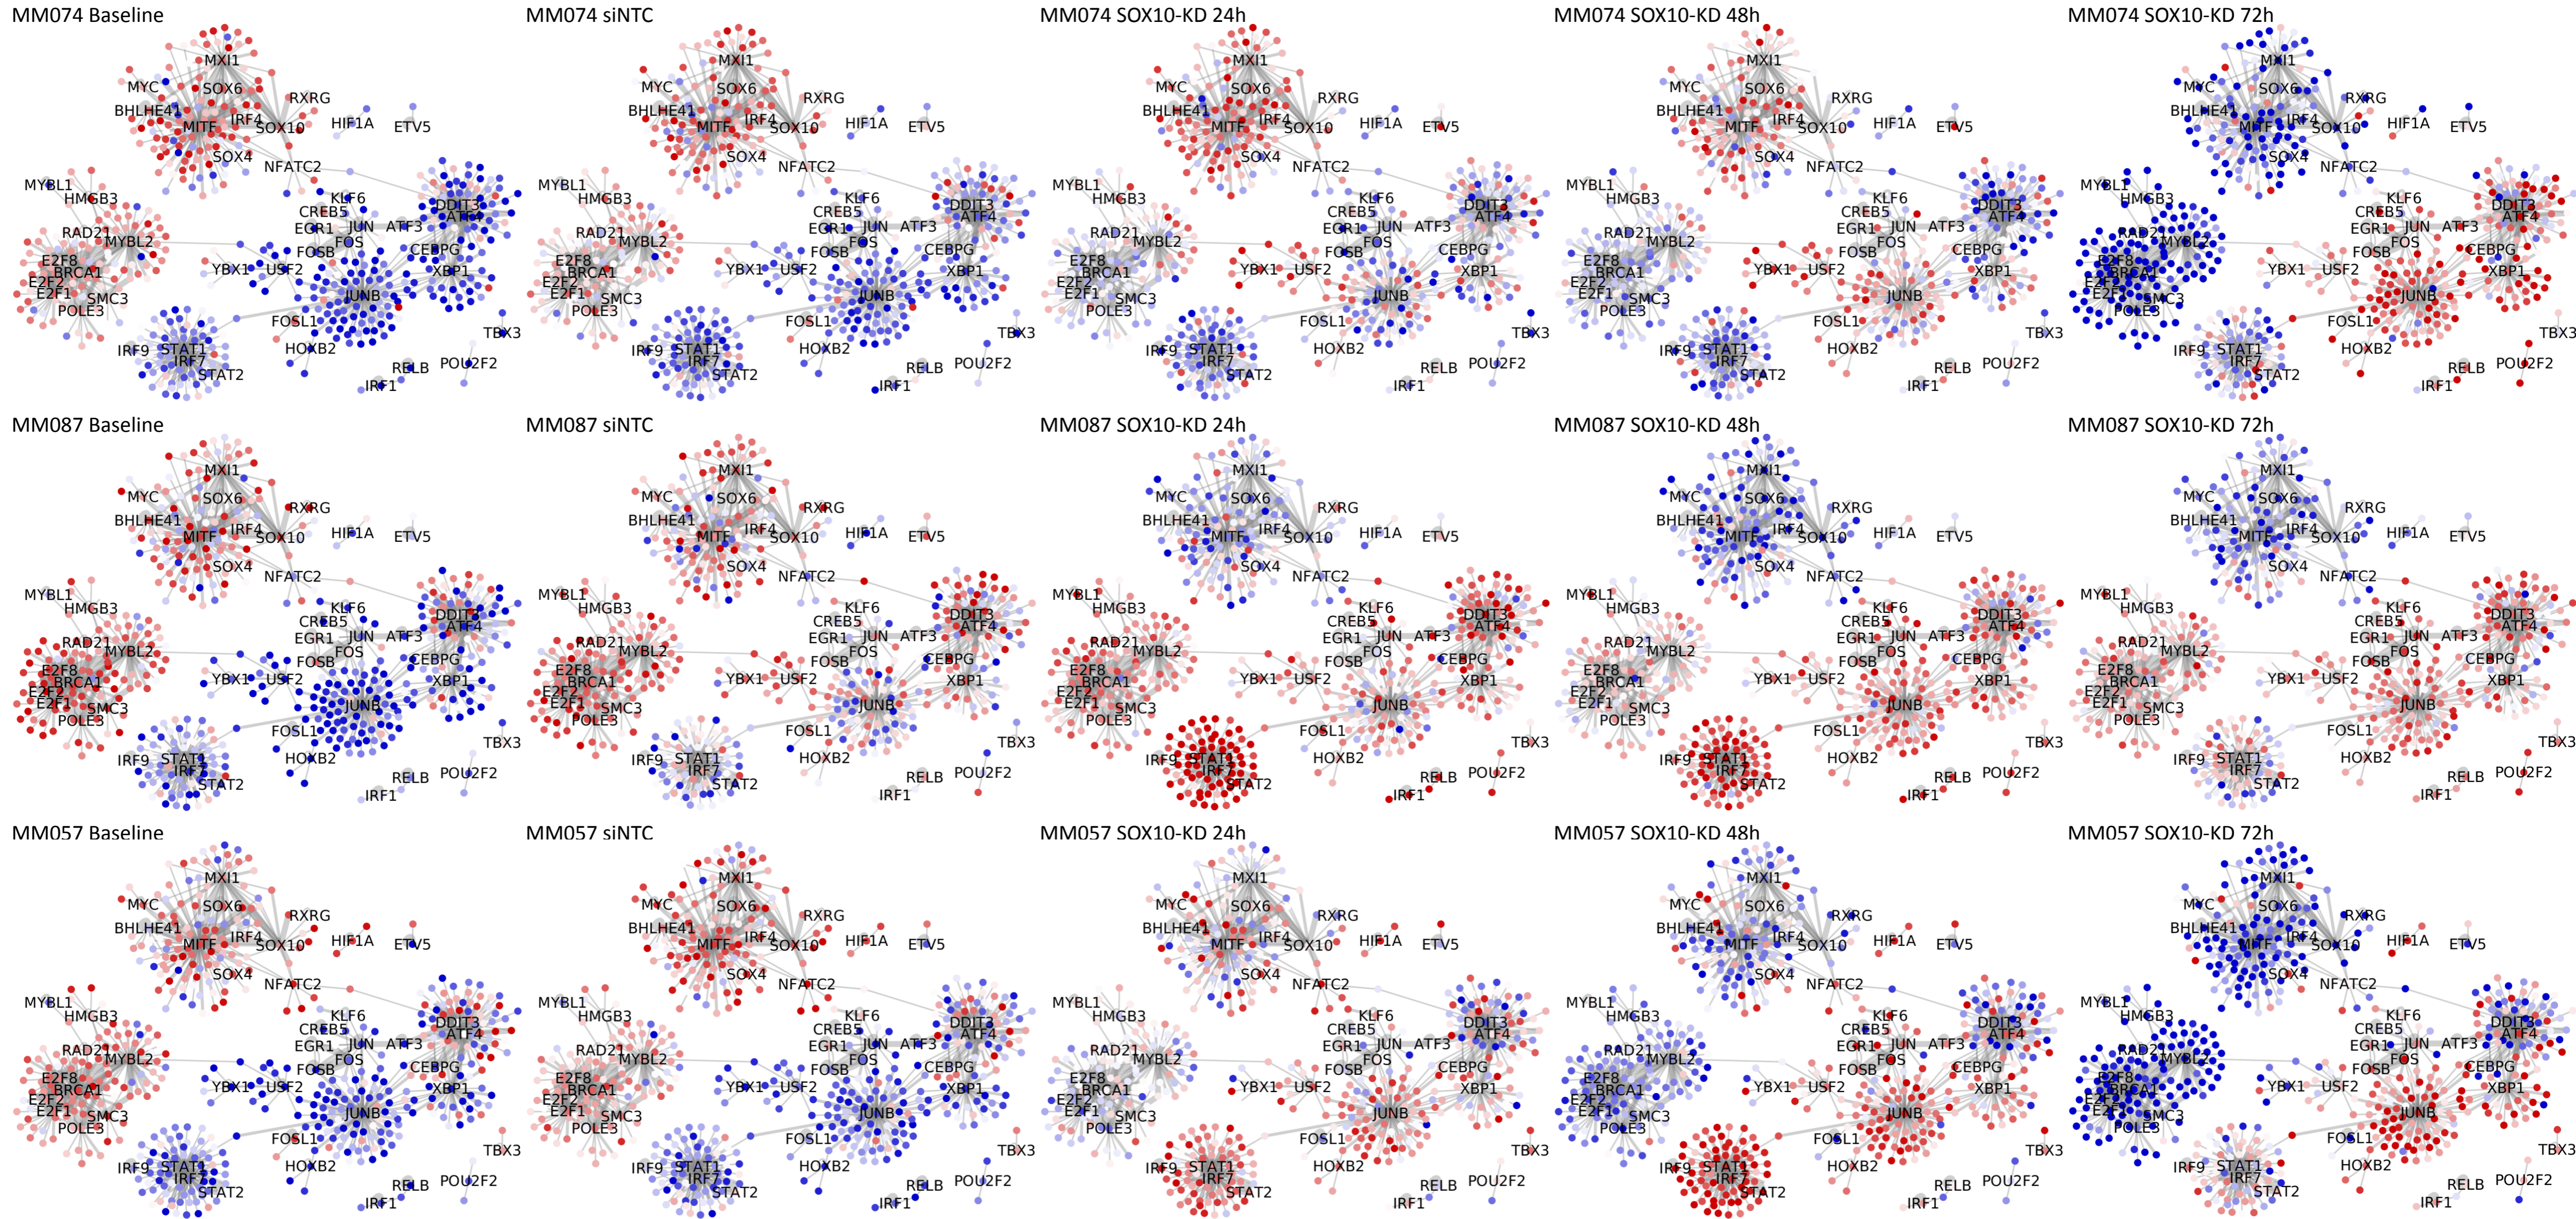

# Supplementary Figure S12

## Comparison to public data

114 genes downregulated after 6h of THZ1 treatment

(Eliades et al., JID, 2018)

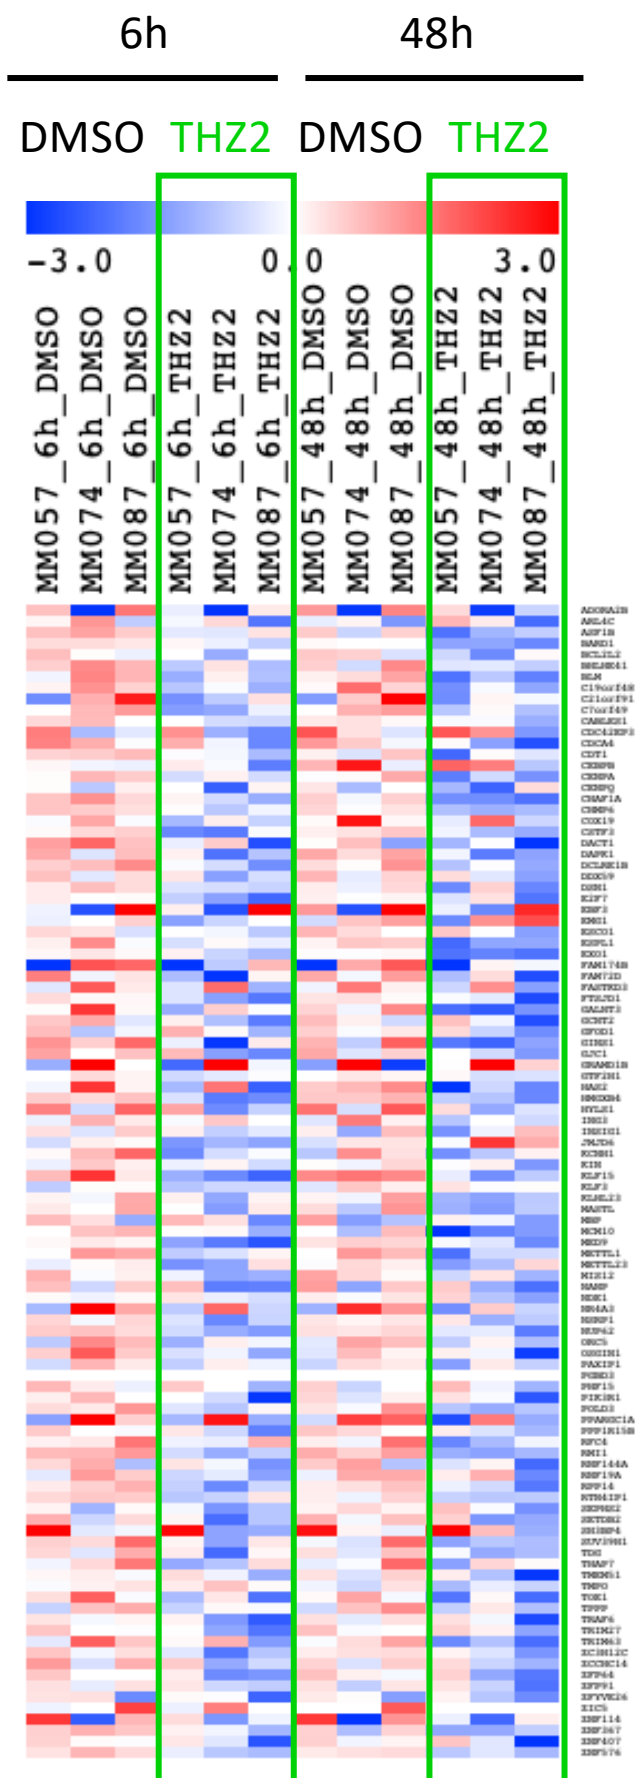

Supplement: Supplementary file [file media-1.pdf]
